# Supplementary figures and images for: A gel electrolyte-based direct seawater electrolysis
Source: Royal Society of Chemistry journal article supplement (doi:10.1039/d5ee00453e), 2025-01-01

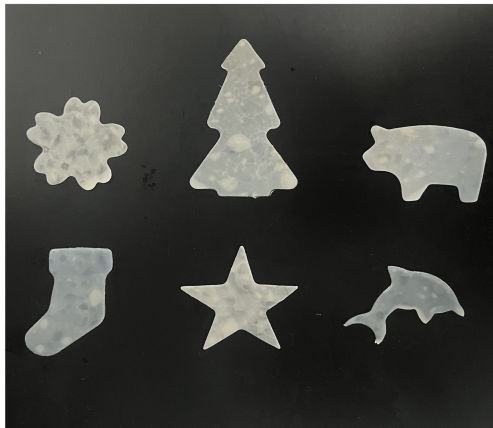

Supplement: d5ee00453e12.pdf [file d5ee00453e12.pdf]

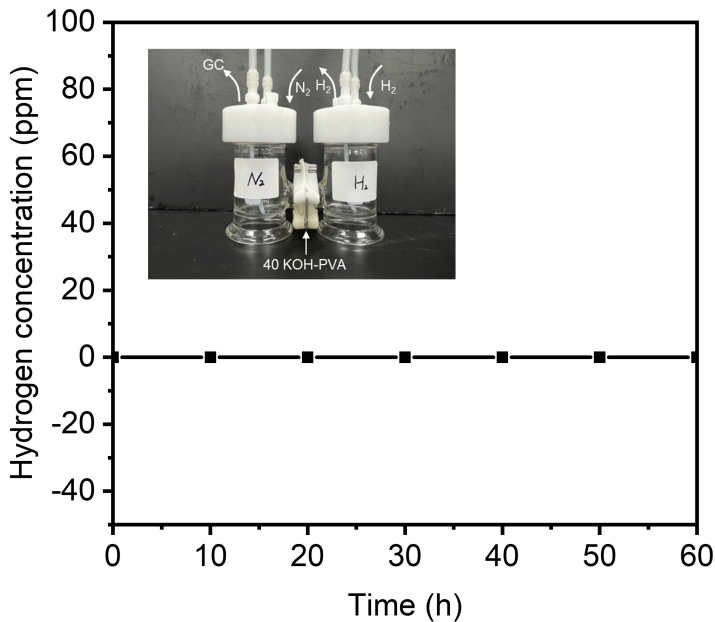

Supplement: d5ee00453e13.pdf [file d5ee00453e13.pdf]

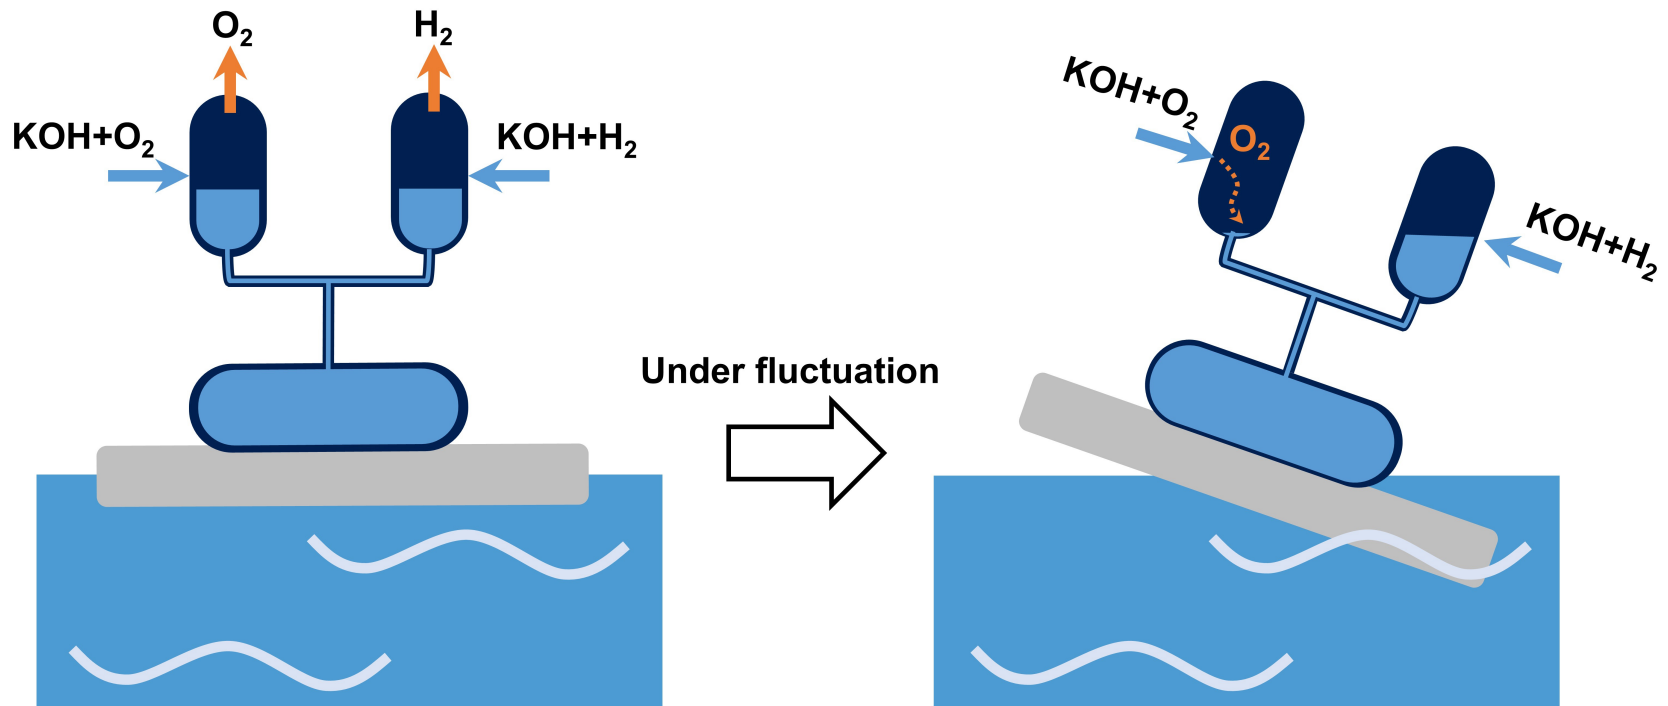

Supplement: d5ee00453e14.pdf [file d5ee00453e14.pdf]

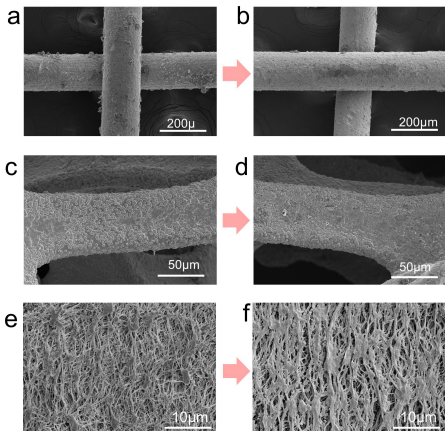

Supplement: d5ee00453e15.pdf [file d5ee00453e15.pdf]

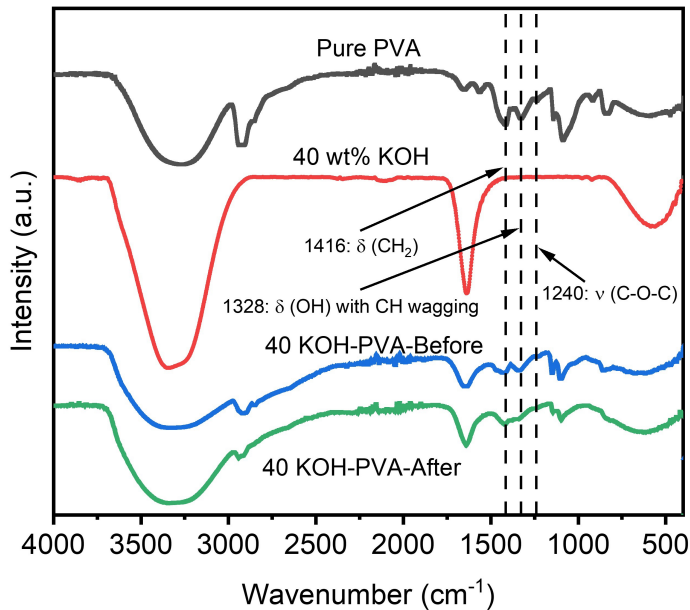

Supplement: d5ee00453e18.pdf [file d5ee00453e18.pdf]

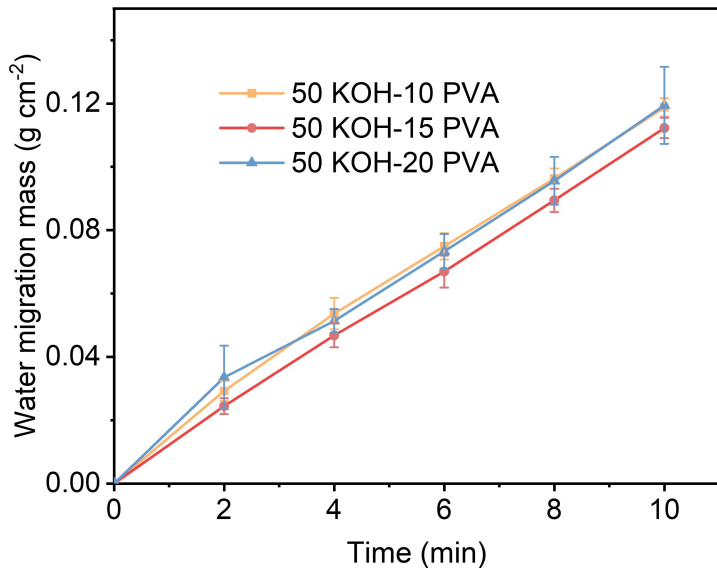

Supplement: d5ee00453e2.pdf [file d5ee00453e2.pdf]

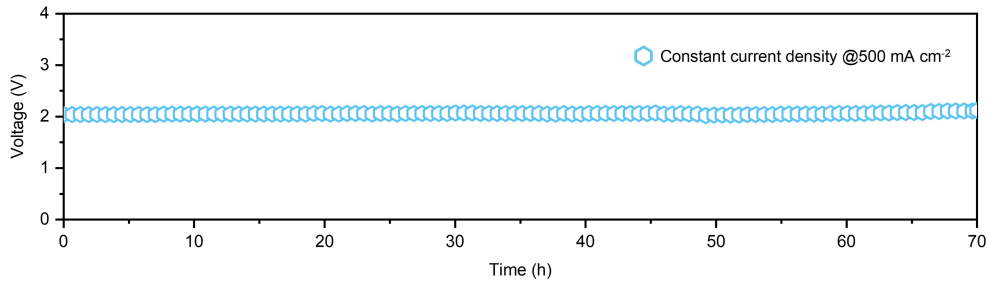

Supplement: d5ee00453e20.pdf [file d5ee00453e20.pdf]

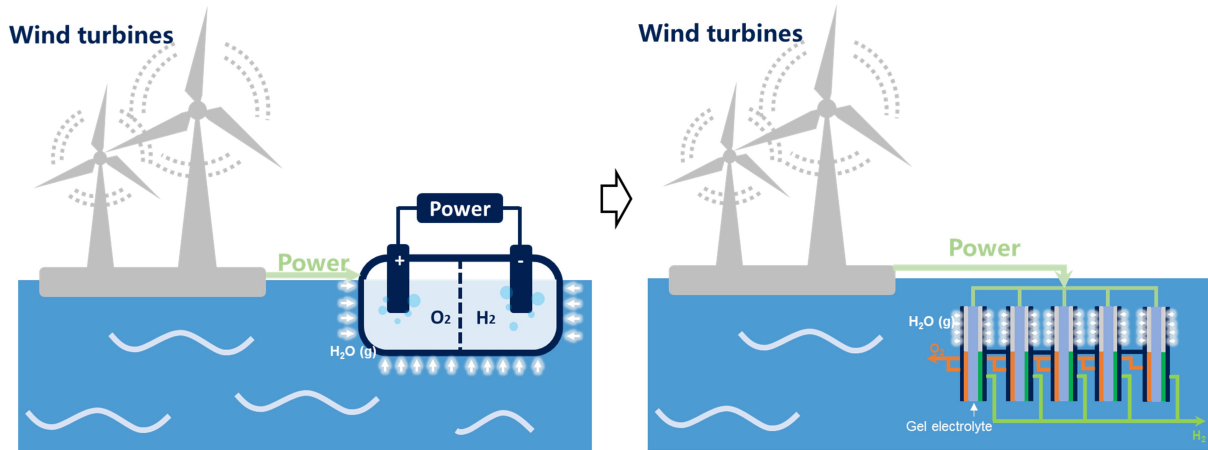

Supplement: d5ee00453e21.pdf [file d5ee00453e21.pdf]

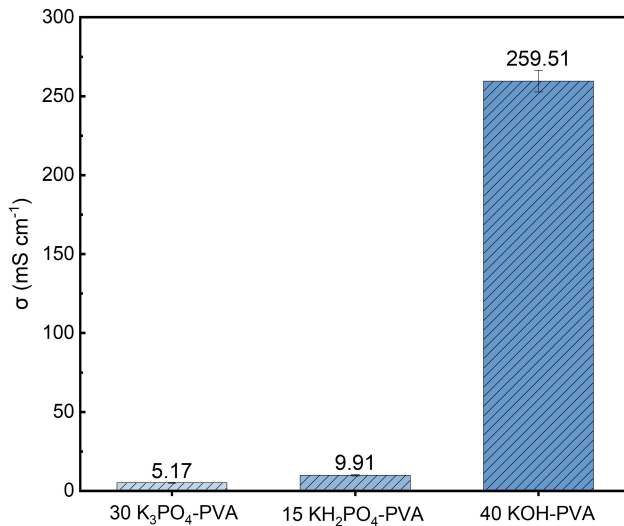

Supplement: d5ee00453e22.pdf [file d5ee00453e22.pdf]

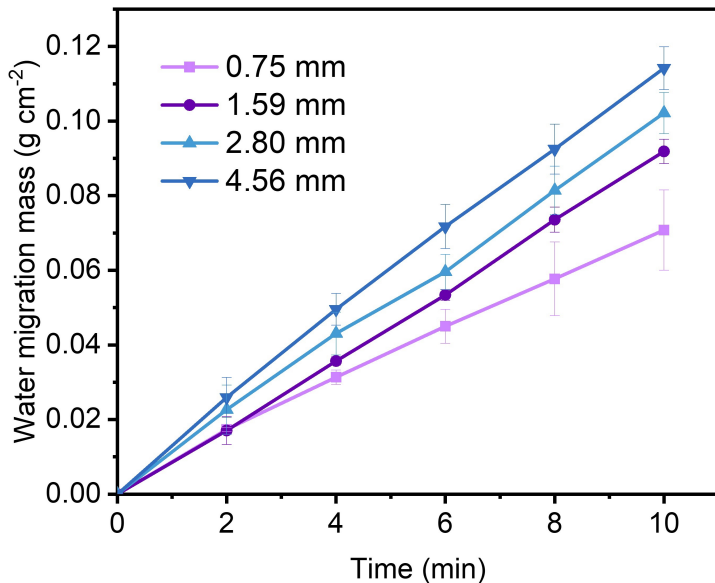

Supplement: d5ee00453e28.pdf [file d5ee00453e28.pdf]

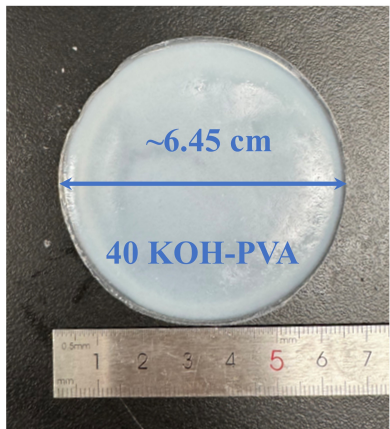

**After 10 minutes of  
water migration**

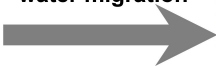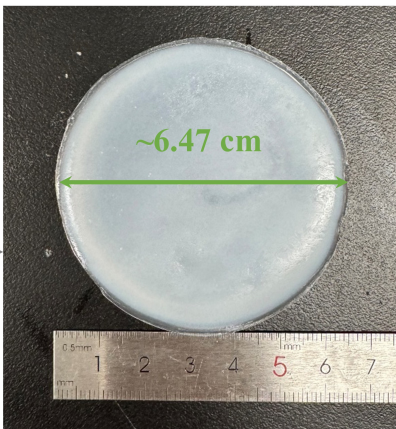

Supplement: d5ee00453e3.pdf [file d5ee00453e3.pdf]

a

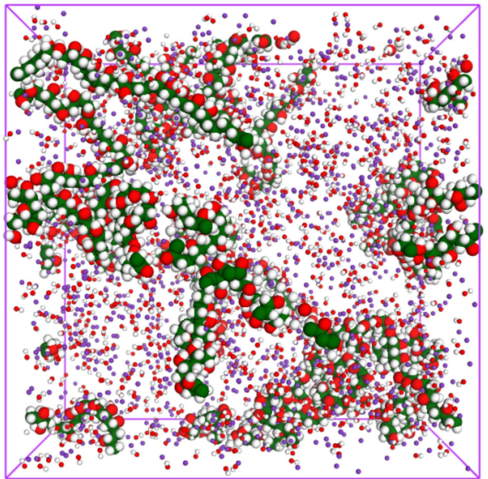

b

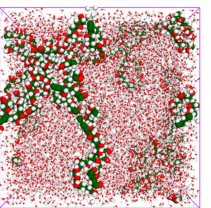

0 ps

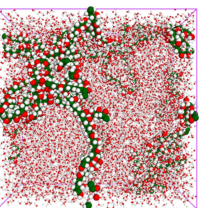

500 ps

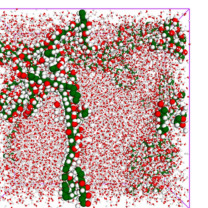

1000 ps

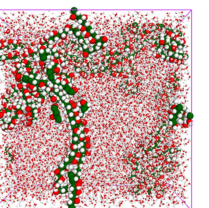

1500 ps

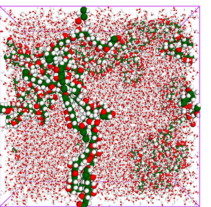

2000 ps

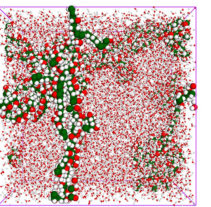

2500 ps

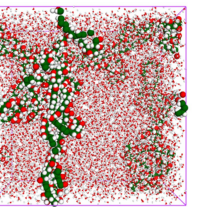

3000 ps

Supplement: d5ee00453e4.pdf [file d5ee00453e4.pdf]

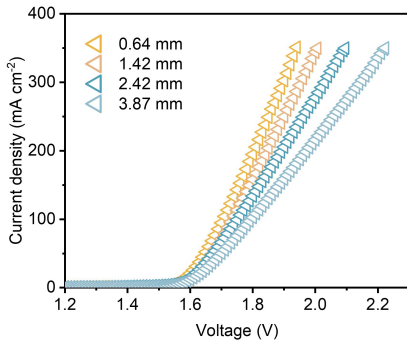

Supplement: d5ee00453e8.pdf [file d5ee00453e8.pdf]

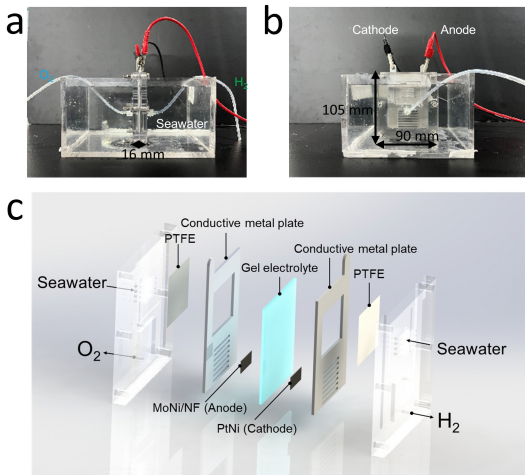

Supplement: d5ee00453e9.pdf [file d5ee00453e9.pdf]
